# Supplementary material for: Rapid Formation of an Ice Doline on Amery Ice Shelf, East Antarctica
Source: PubMed Central journal article supplement — Geophys Res Lett. 2021 Jul 14;48(14):e2020GL091095. doi: 10.1029/2020GL091095 (PMC8365663; doi:10.1029/2020gl091095), 2021-07-14
Supplement: GRL-48-e2020GL091095-s001.pdf [file GRL-48-e2020GL091095-s001.pdf]

**Rapid formation of an ice doline on Amery Ice Shelf, East Antarctica****Roland C. Warner<sup>1</sup>, Helen A. Fricker<sup>2</sup>, Susheel Adusumilli<sup>2</sup>, Philipp Arndt<sup>2</sup>,  
Jonathan Kingslake<sup>3</sup>, Julian Spergel<sup>3</sup>**<sup>1</sup>Australian Antarctic Program Partnership, Institute for Marine and Antarctic Studies,  
University of Tasmania, Hobart, Tasmania, Australia<sup>2</sup>Institute of Geophysics and Planetary Physics, Scripps Institution of Oceanography,  
University of California, San Diego, La Jolla, CA, USA<sup>3</sup>Department of Earth and Environmental Sciences, Lamont-Doherty Earth Observatory  
of Columbia University, Palisades, NY, USA**Contents of this file**

Text S1 to S2

**Introduction**

This Supporting Information provides details about the Landsat-8 and Sentinel-1 (SAR) satellite images cited in the paper, providing dates, image identifiers and the use made of that image. (Text S1)

It also provides information for locating and viewing Landsat-8, Sentinel-1 and MODIS imagery online (Text S2).

## **Text S1.**

### **Sentinel-1 and Landsat 8 images.**

#### Sentinel-1 C-band Synthetic Aperture Radar Images:

Used in Section 2 to constrain the winter drainage event to 7-11 June 2019.

Date: 2019-06-05T22:28:14.966Z

Identifier:

S1A\_IW\_GRDH\_1SSH\_20190605T222814\_20190605T222839\_027550\_031BE1\_528B

Instrument: SAR-C

Mode: IW

Date: 2019-06-11T22:27:33.648Z

Identifier:

S1A\_IW\_GRDH\_1SSH\_20190611T222733\_20190611T222758\_016654\_01F588\_DD69

Instrument: SAR-C

Mode: IW

#### Landsat 8 Images

##### Figure 1b      Prior to drainage event

Date: 2019-03-31                      Path/Row: 126/111

Landsat Scene Identifier:      LC81261112019090LGN00

##### Figure 1c      Post-drainage event

Date: 2019-09-14                      Path/Row: 127/111

Landsat Scene Identifier:      LC81271112019257LGN00

##### Figure 3 a-c    2019/2020 Section 5: Summer meltwater

Date: 2020-01-29                      Path/Row: 126/111

Landsat Scene Identifier:      LC81261122020029LGN00

Other 2020 Landsat 8 scenes mentioned in Section 5: Summer 2019/2020: first melt season in the disrupted hydrologic landscape.

Date: 2020-02-03                      Path/Row: 129/111

Landsat Scene Identifier:      LC81291112020034LGN00

Date: 2020-02-12                      Path/Row: 128/111

Landsat Scene Identifier:      LC81281122020043LGN00

Date: 2020-02-14                      Path/Row: 126/111

Landsat Scene Identifier:      LC81261112020045LGN00

Landsat Scene Identifier information from  
[https://lta.cr.usgs.gov/DD/landsat\\_c2\\_dictionary.html#landsat\\_scene\\_id](https://lta.cr.usgs.gov/DD/landsat_c2_dictionary.html#landsat_scene_id)

Format: LXSPPPRRRYYYYDDDGSIIV

|                                              |                                 |
|----------------------------------------------|---------------------------------|
| L = Landsat                                  | YYYY = Year of Acquisition      |
| X = Sensor (T = TIRS, O = OLI, C = OLI_TIRS) | DDD = Day of Acquisition Year   |
| S = Satellite (8=Landsat-8)                  | GSI = Ground Station Identifier |
| PPP = WRS Path                               | VV = Version                    |
| RRR = WRS Row                                |                                 |

## Text S2.

### Satellite imagery – sources and viewers

Satellite imagery is available from major repositories such as:

- USGS GloVis <https://glovis.usgs.gov/>  
which also provides easy viewing of imagery in a time-line viewer  
and
- USGS EarthExplorer <https://earthexplorer.usgs.gov/>  
both provide access to Landsat 8 (and more).
- sentinelhub’s Playground and EO Browser <https://www.sentinel-hub.com/>  
for Sentinel-1 and Landsat 8, MODIS (and more).
- ESA’s Copernicus Open Access Hub <https://scihub.copernicus.eu/>  
also provides free and open access to Sentinel-1, Sentinel-2 data (and more).

We also consulted MODIS imagery for the timing of the January 2020 meltwater events (Section 5). For that task we simply viewed the relevant periods using the online viewing tool:

- NASA WORLDVIEW <https://worldview.earthdata.nasa.gov/>  
which can display MODIS imagery from the Terra and Aqua satellites.

For browsing Landsat 8 imagery in time-line mode we also used:

- Antarctic REMA Explorer <https://livingatlas2.arcgis.com/antarcticdemexplorer/>  
which provides the facility to view imagery by date, with the REMA (Reference Elevation Model for Antarctica) mosaic also available for reference.
